# Supplementary material
Source: publisher site journal article supplement (https://www.dovepress.com/article/532668)
Supplement: Supplementary file 1 [file 532668%20Revised%20supplementary%20materials.docx]

Table S1 Risk of outcomes in JAKi vs TNFi cohorts as stratified by sex.

| **Outcomes**  (JAKi vs. TNFi cohort) | | **Adjusted hazard ratios ( 95%CI )**a | | P for interaction |
| --- | --- | --- | --- | --- |
| **Male**  (n=742 vs 742) | **Female**  (n=3,290 vs 3,290) |
| **Cancer incidence** | |  |  |  |
|  | Lip, oral cavity and pharynx cancers | 1.173 (0.073-18.86) | 0.852 (0.229-3.175) | 0.838 |
|  | Digestive organs cancers | 0.905 (0.468-1.747) | **0.532 (0.373-0.759)** | 0.164 |
|  | Respiratory and intrathoracic organs cancers | 1.816 (0.434-7.609) | **2.582 (1.109-6.011)** | 0.678 |
|  | Bone and articular cartilage cancers | NA | NA | NA |
|  | Melanoma and other skin cancers | 1.528 (0.782-2.988) | 0.926 (0.612-1.401) | 0.212 |
|  | Mesothelial and soft tissue cancers | NA | 0.380 (0.076-1.898) | NA |
|  | Breast cancers | NA | 0.857 (0.523-1.406) | NA |
|  | Female genital organs cancers§ | NA | 0.948 (0.477-1.884) | NA |
|  | Male genital organs cancers¥ | 0.508 (0.207-1.246) | NA | NA |
|  | Urinary tract cancers | 0.157 (0.019-1.277) | 1.082 (0.438-2.674) | 0.098 |
|  | Eye, brain and other parts of CNS cancers | NA | NA | NA |
|  | Thyroid and other endocrine glands cancers | 1.202 (0.075-19.30) | 1.765 (0.625-4.986) | 0.799 |
|  | Ill-defined, other unspecified sites cancers | 1.805 (0.819-3.981) | **0.608 (0.389-0.949)** | **0.018** |
|  | Malignant neuroendocrine tumors | 2.381 (0.216-26.30) | 1.263 (0.078-20.52) | 0.735 |
|  | Lymphoid, hematopoietic and related cancers | 1.748 (0.619-4.930) | 0.581 (0.329-1.027) | 0.068 |
|  | Overall cancers (any cancers mentioned above) | 0.968 (0.674-1.390) | 0.834 (0.685-1.016) | 0.225 |
| **Mortality** | |  |  |  |
|  | Deceased | 0.921 (0.575-1.478) | 1.290 (0.964-1.726) | 0.233 |

a. After propensity score matching performed on all listed characteristics (age at index, sex, race, socioeconomic status, family history, lifestyles, comorbidities, medical utilization, and medication usage).

§ only applies to female; ¥ only applies to male.

Abbreviations: CI: Confidence interval; JAKi: Janus kinase inhibitors; TNFi: Tumor necrosis factor inhibitors; CNS: central nervous system; NA: not available; vs: versus.

Table S2 Risk of outcomes in JAKi vs TNFi cohorts as stratified by age.

| **Outcomes**  (JAKi vs. TNFi cohort) | | **Adjusted hazard ratios ( 95%CI )**a | | P for interaction |
| --- | --- | --- | --- | --- |
| **19-64y**  (n=2,780 vs 2780) | **≧ 65y**  (n=1,339 vs 1,339) |
| **Cancer incidence** | |  |  |  |
|  | Lip, oral cavity and pharynx cancers | 2.058 (0.377-11.23) | 2.300 (0.208-25.45) | 0.940 |
|  | Digestive organs cancers | **0.477 (0.319-0.712)** | **0.597 (0.382-0.934)** | 0.464 |
|  | Respiratory and intrathoracic organs cancers | 0.876 (0.367-2.087) | 0.835 (0.401-1.742) | 0.934 |
|  | Bone and articular cartilage cancers | NA | NA | NA |
|  | Melanoma and other skin cancers | 0.891 (0.534-1.488) | 1.110 (0.715-1.723) | 0.523 |
|  | Mesothelial and soft tissue cancers | 0.347 (0.036-3.332) | 0.377 (0.039-3.636) | 0.959 |
|  | Breast cancers | 0.710 (0.363-1.391) | 0.857 (0.405-1.816) | 0.714 |
|  | Female genital organs cancers§ | 1.232 (0.552-2.751) | 1.077 (0.269-4.310) | 0.869 |
|  | Male genital organs cancers¥ | 0.391 (0.105-1.454) | 0.449 (0.174-1.158) | 0.867 |
|  | Urinary tract cancers | 0.560 (0.140-2.244) | 1.883 (0.615-5.765) | 0.182 |
|  | Eye, brain and other parts of CNS cancers | NA | NA | NA |
|  | Thyroid and other endocrine glands cancers | 0.883 (0.278-2.805) | 2.558 (0.661-9.902) | 0.241 |
|  | Ill-defined, other unspecified sites cancers | 0.628 (0.376-1.048) | 0.983 (0.579-1.668) | 0.233 |
|  | Malignant neuroendocrine tumors | 0.534 (0.048-5.898) | 0.846 (0.141-5.088) | 0.763 |
|  | Lymphoid, hematopoietic and related cancers | 0.750 (0.388-1.448) | 1.100 (0.530-2.284) | 0.445 |
|  | Overall cancer (any cancers mentioned above) | **0.713 (0.567-0.897)** | 0.887 (0.700-1.124) | 0.194 |
| **Mortality** | |  |  |  |
|  | Deceased | 1.338 (0.856-2.090) | 1.315 (0.969-1.784) | 0.949 |

a. After propensity score matching performed on all listed characteristics (age at index, sex, race, socioeconomic status, family history, lifestyles, comorbidities, medical utilization, and medication usage).

§ only applies to female; ¥ only applies to male.

Abbreviations: CI: Confidence interval; JAKi: Janus kinase inhibitors; TNFi: Tumor necrosis factor inhibitors; CNS: central nervous system; NA: not available. vs: versus.

Table S3 Risk of outcomes in JAKi vs TNFi cohorts as stratified by race.

| **Outcomes**  (JAKi vs. TNFi cohort) | | **Adjusted hazard ratios ( 95%CI )**a | | P for interaction |
| --- | --- | --- | --- | --- |
| **White**  (n=2,948 vs 2,948) | **Black/**  **African American**  (n=528 vs 528) |
| **Cancer incidence** | |  |  |  |
|  | Lip, oral cavity and pharynx cancers | 2.751 (0.533-14.19) | NA | NA |
|  | Digestive organs cancers | **0.566 (0.399-0.802)** | 0.407 (0.159-1.042) | 0.519 |
|  | Respiratory and intrathoracic organs cancers | 1.038 (0.517-2.083) | 2.996 (0.575-15.61) | 0.246 |
|  | Bone and articular cartilage cancers | NA | NA | NA |
|  | Melanoma and other skin cancers | 1.012 (0.702-1.459) | NA | NA |
|  | Mesothelial and soft tissue cancers | 1.109 (0.156-7.900) | NA | NA |
|  | Breast cancers | 0.742 (0.416-1.325) | 2.725 (0.701-10.58) | 0.083 |
|  | Female genital organs cancers§ | 1.022 (0.471-2.214) | 1.023 (0.064-16.37) | 0.999 |
|  | Male genital organs cancers¥ | 1.156 (0.404-3.307) | NA | NA |
|  | Urinary tract cancers | 0.824 (0.313-2.167) | 0.567 (0.104-3.102) | 0.707 |
|  | Eye, brain and other parts of CNS cancers | NA | NA | NA |
|  | Thyroid and other endocrine glands cancers | 2.263 (0.679-7.539) | 0.395 (0.041-3.823) | 0.182 |
|  | Ill-defined, other unspecified sites cancers | **0.624 (0.415-0.937)** | 1.414 (0.377-5.299) | 0.246 |
|  | Malignant neuroendocrine tumors | 0.618 (0.113-3.379) | 0.984 (0.062-15.73) | 0.778 |
|  | Lymphoid, hematopoietic and related cancers | 0.843 (0.485-1.463) | 0.835 (0.186-3.744) | 0.990 |
|  | Overall cancer (any cancers mentioned above) | 0.827 (0.685-1.000) | 0.761 (0.441-1.311) | 0.777 |
| **Mortality** | |  |  |  |
|  | Deceased | 1.175 (0.893-1.546) | 0.965 (0.463-2.012) | 0.622 |

a. After propensity score matching performed on all listed characteristics (age at index, sex, race, socioeconomic status, family history, lifestyles, comorbidities, medical utilization, and medication usage).

§ only applies to female; ¥ only applies to male.

Abbreviations: CI: Confidence interval; JAKi: Janus kinase inhibitors; TNFi: Tumor necrosis factor inhibitors; CNS: central nervous system; NA: not available. vs: versus.

Table S4 Risk of outcomes in JAKi vs TNFi cohorts among newly diagnosed RA patients

| **Outcomes** | | Patients with outcome | | **Adjusted**a **hazard ratio**  **(95% CI)** |
| --- | --- | --- | --- | --- |
| JAKi cohort  (n=2,198) | TNFi cohort  (n=2,198) |
| **Cancer incidence** | |  |  |  |
|  | Lip, oral cavity and pharynx cancers | 10 | 10 | 0.537 (0.098-2.944) |
|  | Digestive organs cancers | 25 | 53 | **0.486 (0.302-0.782)** |
|  | Respiratory and intrathoracic organs cancers | 10 | 12 | 0.782 (0.329-1.856) |
|  | Bone and articular cartilage cancers | 0 | 0 | NA |
|  | Melanoma and other skin cancers | 39 | 25 | 1.637 (0.990-2.706) |
|  | Mesothelial and soft tissue cancers | 0 | 10 | NA |
|  | Breast cancers | 10 | 13 | 0.795 (0.349-1.814) |
|  | Female genital organs cancers§ | 10 | 10 | 0.971 (0.393-2.397) |
|  | Male genital organs cancers¥ | 10 | 10 | 1.040 (0.301-3.594) |
|  | Urinary tract cancers | 10 | 10 | 0.341 (0.092-1.259) |
|  | Eye, brain and other parts of CNS cancers | 0 | 10 | NA |
|  | Thyroid and other endocrine glands cancers | 10 | 10 | 1.317 (0.353-4.912) |
|  | Ill-defined, other unspecified sites cancers | 21 | 30 | 0.732 (0.419-1.279) |
|  | Malignant neuroendocrine tumors | 10 | 10 | 0.825 (0.136-4.999) |
|  | Lymphoid, hematopoietic and related tissue cancers | 15 | 14 | 1.144 (0.552-2.372) |
|  | Overall cancer (any cancers mentioned above) | 113 | 140 | 0.834 (0.651-1.068) |
| **All-cause mortality** | |  |  |  |
|  | Deceased | 52 | 39 | 1.397 (0.922-2.117) |

a. After propensity score matching performed on all listed characteristics (age at index, sex, race, socioeconomic status, family history, lifestyles, comorbidities, medical utilization, and medication usage).

§ only applies to female; ¥ only applies to male.

Abbreviations: CI: Confidence interval; JAKi: Janus kinase inhibitors; TNFi: Tumor necrosis factor inhibitors; CNS: central nervous system; NA: not available. vs: versus.

If the patient is less or equal to 10, results show the count as 10.

Table S5 Risk of outcomes in JAKi versus TNFi cohorts as stratified by different definition of cohorts (prescription≧3 times, switchers not excluded)

| **Outcomes** | | Patients with outcome | | **Adjusted**a **hazard ratio**  **(95% CI)** |
| --- | --- | --- | --- | --- |
| JAKi cohort  (n=7,394) | TNFi cohort  (n=7,394)_ |
| **Cancer incidence** | |  |  |  |
|  | Lip, oral cavity and pharynx cancers | 10 | 11 | 0.498 (0.173-1.438) |
|  | Digestive organs cancers | 200 | 283 | **0.795 (0.663-0.953)** |
|  | Respiratory and intrathoracic organs cancers | 37 | 42 | 1.001 (0.643-1.560) |
|  | Bone and articular cartilage cancers | 10 | 10 | 0.365 (0.038-3.514) |
|  | Melanoma and other skin cancers | 138 | 149 | 1.048 (0.831-1.322) |
|  | Mesothelial and soft tissue cancers | 10 | 10 | 1.211 (0.388-3.781) |
|  | Breast cancers | 59 | 74 | 0.870 (0.618-1.226) |
|  | Female genital organs cancers§ | 26 | 34 | 0.847 (0.508-1.413) |
|  | Male genital organs cancers¥ | 26 | 36 | 0.815 (0.491-1.352) |
|  | Urinary tract cancers | 19 | 21 | 1.052 (0.564-1.961) |
|  | Eye, brain and other parts of CNS cancers | 10 | 10 | 1.141 (0.071-18.25) |
|  | Thyroid and other endocrine glands cancers | 19 | 22 | 0.911 (0.493-1.685) |
|  | Ill-defined, other unspecified sites cancers | 104 | 143 | 0.805 (0.625-1.036) |
|  | Malignant neuroendocrine tumors | 10 | 10 | 2.848 (0.734-11.05) |
|  | Lymphoid, hematopoietic and related tissue cancers | 63 | 64 | 1.111 (0.784-1.574) |
|  | Overall cancer (any cancers mentioned above) | 543 | 652 | 0.920 (0.821-1.032) |
| **All-cause mortality** | |  |  |  |
|  | Deceased | 200 | 212 | 1.119 (0.922-1.359) |

a. After propensity score matching performed on all listed characteristics (age at index, sex, race, socioeconomic status, family history, lifestyles, comorbidities, medical utilization, and medication usage).

§ only applies to female; ¥ only applies to male.

Abbreviations: CI: Confidence interval; JAKi: Janus kinase inhibitors; TNFi: Tumor necrosis factor inhibitors; CNS: central nervous system; NA: not available.

If the patient is less or equal to 10, results show the count as 10.

Table S6 Risk of outcomes in JAKi versus TNFi cohorts as stratified by different follow up duration.

| **Outcomes** | | **Adjusted**a **hazard ratios (95% CI)** | | |
| --- | --- | --- | --- | --- |
| **90 days to 1 year** | **90 days to 3 years** | **90 days to 5 years**  (entire cohort) |
| **Cancer incidence** | |  |  |  |
|  | Lip, oral cavity and pharynx cancers | 0.512 (0.094-2.793) | 0.888 (0.271-2.911) | 0.888 (0.271-2.911) |
|  | Digestive organs cancers | **0.608 (0.393-0.942)** | **0.644 (0.465-0.891)** | **0.599 (0.439-0.817)** |
|  | Respiratory and intrathoracic organs cancers | 1.022 (0.443-2.357) | 1.109 (0.596-2.064) | 1.049 (0.590-1.866) |
|  | Bone and articular cartilage cancers | NA | NA | NA |
|  | Melanoma and other skin cancers | 0.964 (0.581-1.600) | 0.934 (0.661-1.322) | 0.930 (0.665-1.302) |
|  | Mesothelial and soft tissue cancers | 2.039 (0.185-22.48) | 0.542 (0.099-2.965) | 0.460 (0.089-2.385) |
|  | Breast cancers | 0.829 (0.437-1.572) | 0.743 (0.446-1.237) | 0.830 (0.507-1.357) |
|  | Female genital organs cancers§ | 0.686 (0.244-1.929) | 1.281 (0.592-2.771) | 1.242 (0.598-2.581) |
|  | Male genital organs cancers¥ | 0.771 (0.172-3.443) | 1.086 (0.381-3.100) | 0.983 (0.355-2.720) |
|  | Urinary tract cancers | 1.030 (0.258-4.120) | 1.043 (0.442-2.458) | 0.983 (0.424-2.282) |
|  | Eye, brain and other parts of CNS cancers | NA | NA | NA |
|  | Thyroid and other endocrine glands cancers | 1.027 (0.331-3.185) | 1.068 (0.401-2.849) | 1.268 (0.514-3.131) |
|  | Ill-defined, other unspecified sites cancers | 1.026 (0.607-1.732) | 0.824 (0.559-1.213) | 0.782 (0.537-1.141) |
|  | Malignant neuroendocrine tumors | NA | 3.454 (0.358-33.27) | 0.975 (0.217-4.378) |
|  | Lymphoid, hematopoietic and related cancers | 0.718 (0.363-1.422) | 0.658 (0.387-1.118) | 0.753 (0.463-1.226) |
|  | Overall cancer (any cancers mentioned above) | **0.775 (0.613-0.980)** | **0.833 (0.696-0.997)** | 0.853 (0.718-1.014) |
| **Mortality** | |  |  |  |
|  | Deceased | 1.129 (0.747-1.708) | 1.140 (0.871-1.492) | 1.191 (0.932-1.522) |

a. After propensity score matching performed on all listed characteristics (age at index, sex, race, socioeconomic status, family history, lifestyles, comorbidities, medical utilization, and medication usage).

§ only applies to female; ¥ only applies to male.

Abbreviations: CI: Confidence interval; JAKi: Janus kinase inhibitors; TNFi: Tumor necrosis factor inhibitors; CNS: central nervous system; NA: not available.
